# Supplementary material for: Ethnic Differences in Spermatozoa Morphological Defects Diversity Among Men From Eastern Siberia, Russia
Source: Research Square preprint supplement (doi:10.21203/rs.3.rs-106034/v1), 2020-11-17
Supplement: Supplementary file 1 [file d92f6426df65ae3a4ba62f94.xlsx]

## Sheet: Supplementary table 1
	Supplementary Table 1. The results of two-way ANOVA for semen quality and percentages of sperm morphological defects.
	Parameters	Factors in ANOVA
		Ethnos	Sperm quality status (SQS)	Ethnos ×SQS interaction
	Semen quality
	Sperm count, mln	NS	F2, 405=119,71, p<0.01	NS
	Sperm concentration, mln/ml	NS	F2, 405=223.83, p<0.01	NS
	Sperm motility, %	NS	F2. 405=390.46, p<0.01	F4, 405=4.39, p<0.01
	Norma sperm, %	F2, 405=15.8, p<0.01	F2, 405=79.75, p<0.01
	TZI		F2, 405=55.01, p<0.01	F4, 405=2.40, p<0.05
	Head abnormalities
	Amorphous, %	F2, 405=16.0, p<0.01	NS	NS
	Pyriform, %	F2 405=16.2, p<0.01	NS	NS
	Elongated, %	F2, 405=8.70, p<0.01	NS	NS
	Round, %	F2, 405=12.3, p<0.01	NS	NS
	Tapered, %	F2, 405=3.60, p<0.05	NS	NS
	Vacuolated, %	F2, 405=3.37, p<0.01	NS	NS
	Abnormal acrosome, %	NS	F2, 405=13.37, p<0.01	NS
	Midpiece abnormalities
	Bent head, %	F2, 405=9.21, p<0.01	F2, 405=21.44, p<0.01	NS
	Assymetrical neck insertion , %	F2, 405=5.60, p<0.01	NS	NS
	Thick, %	NS	F2, 405=3.21, p<0.05	NS
	Tail abnormalities
	Double, %	NS	NS	NS
	Coiled, %	F2, 405=5.40,p<0.01	F2, 405=14.44, p<0.01	NS
	Short, %	NS	F2, 405=23.88, p<0.01	NS
	Excessive residual cytoplasm
	ERC, %	F2, 405=4.40, p<0.05	F2, 405=6.48, p<0.01	NS
	Abnormalities in different parts of spermatozoon
	Head, %	F2, 405=12.10, p<0.01	F2, 405=22.94, p<0.01	NS
	Midpiece, %	NS	NS	NS
	Tail, %	NS	NS	NS
	Head&Midpiece, %	F2, 405=6.80, p<0.01	F2, 405=10.15, p<0.01	NS
	Head&Tail, %	F2, 405=6,01, p<0.01	F2, 405=19.56, p<0.01	NS
	Midpiece&Tail, %	NS	NS	NS
	Head&Midpiece&Tail, %	F2, 405=44,74, p<0.01	NS	NS
	Note. NS - lack of significant factor influence. ERC – excessive residual cytoplasm.

## Sheet: Supplementary table 2
	Supplementary Table 2. Spearman correlation coefficients for relationships between sperm morhology defects rates and other sperm parameters.
		Sperm count	Sperm concentration	Sperm progressive motility
	Sperm morphology
	Normal sperm, %	0.42	0.54	0.64
	TZI	-0.28	-0.43	-0.57
	Amorphous head %	0	0.05	0.09
	Pyriform head%	-0.07	-0.08	-0.11
	Elongated head %	-0.07	-0.13	-0.17
	Round head%	-0.1	-0.11	-0.11
	Large head %	0.06	0.08	0.12
	Small head%	0.02	0	-0.04
	Double head %	-0.12	-0.13	-0.14
	Vacuolated head%	-0.02	-0.07	-0.07
	Acrosome defect %	-0.22	-0.31	-0.37
	Bent head %	-0.19	-0.29	-0.39
	ERC %	-0.05	-0.09	-0.17
	Asymmetrical neck %	-0.14	-0.15	-0.13
	Thick mipiece %	-0.12	-0.1	-0.08
	Thin midpiece %	-0.06	-0.13	-0.17
	Double tail %	-0.13	-0.14	-0.07
	Coiled tail%	-0.03	-0.18	-0.33
	Short tail %	-0.28	-0.38	-0.41
	Note. Significant (p<0.05) correlation coefficients are highlighted by bold font.

## Sheet: Supplementary table 3
	Supplementary Table 3. Spearman correlation coefficients for relationships between sperm morhology defects rates.
		Amorphous head	Pyriform head %	Elongated head %	Round head%	Large head %	Small head%	Double head%	Vacuolated head%	AbnAc %	Bent head %	ERC %	Asymmetrical insertion %	Thick mipiece %	Thin midpiece %	Double tail %	Coiled tail%
	Pyriform head %	-0.65
	Elongated head %	-0.81	0.61
	Round head%	0.38	-0.51	-0.47
	Large head %	0.05	-0.05	-0.04	0.02
	Small head%	0.16	-0.21	-0.11	0.31	0.11
	Double head%	-0.01	-0.07	0.03	0.07	-0.05	0.01
	Vacuolated head%	-0.2	0.28	0.22	-0.24	-0.03	-0.02	0.05
	AbnAc %	-0.11	-0.12	0.23	0.3	-0.06	0.22	0.14	0.06
	Bent head %	-0.25	0.35	0.3	-0.12	0.04	-0.11	0.08	0.05	0.15
	ERC %	-0.16	0.34	0.12	-0.12	0.07	0.02	0.02	0.14	-0.01	0.3
	Asymmetrical insertion %	-0.06	-0.14	-0.03	0.1	-0.1	0.04	0.06	0.08	0.18	-0.22	-0.09
	Thick mipiece %	0.17	-0.09	-0.11	0.08	0.1	0.06	0.02	-0.07	0.02	0.03	0.27	-0.05
	Thin midpiece %	-0.08	0.01	0.08	0.08	-0.06	0.05	0.14	-0.03	0.25	0.12	-0.05	0.11	-0.04
	Double tail %	0.03	-0.06	0.01	0.08	0.05	0.03	0.14	0.01	0.07	-0.08	0.06	0.08	0.09	-0.06
	Coiled tail%	-0.18	0.13	0.16	-0.1	-0.15	-0.03	0.05	0.09	0.15	0.36	0.11	-0.02	-0.03	0.03	-0.12
	Short tail %	-0.07	0.06	0.07	0.06	0.04	0	0.03	0.09	0.18	0.22	0.01	0.12	-0.01	0.13	-0.05	0.34
	Note.	Significant (p<0.05) correlation coefficients are highlighted by bold font.
		AbnAc - sperm with abnormal acrosome
		ERC - excessive residual cytoplasm
